# Supplementary material for: Metal anchoring strategy: electrochemical sensor with excellent performance in gastrointestinal secretions
Source: Royal Society of Chemistry journal article supplement (doi:10.1039/d6ra01510g), 2026-05-12
Supplement: d6ra01510g1.pdf [file d6ra01510g1.pdf]

## Supporting Information

### **Metal anchoring strategy: electrochemical sensor with excellent performance in gastrointestinal secretions**

*Juanjuan Ji<sup>a\*</sup>, Baohong Shen<sup>b</sup>, Fang Yang<sup>a</sup>, Sujuan Li<sup>c</sup>, Hao Lin<sup>d</sup>, Yuyu Wang<sup>a</sup> and Lu Yang<sup>a</sup>*

a. Department of Gastroenterology, The First Affiliated Hospital of Xinxiang Medical University, , Henan 453100, China

b. Department of Oral and maxillofacial surgery, The First Affiliated Hospital of Xinxiang Medical University, , Henan 453100, China

c. Department of Integrated Traditional Chinese and Western Medicine, The First Affiliated Hospital of Xinxiang Medical University, , Henan 453100, China

\* Corresponding author.

E-mail address: [juanjuanSCI@126.com](mailto:juanjuanSCI@126.com)

## Table of Contents

|                                                                                                                       |   |
|-----------------------------------------------------------------------------------------------------------------------|---|
| <b>Results and Discussion</b> .....                                                                                   | 3 |
| <b>Fig. S1.</b> PXRD patterns of HKUST-1. The synthesized (red line) and simulated one of HKUST-1 (black line). ..... | 3 |
| <b>Fig. S2.</b> FTIR spectrum of HKUST-1 and Au@HKUST-1. ....                                                         | 3 |
| <b>Fig. S3.</b> FTIR spectrum of Au@HKUST-1 after soaking under different conditions. ....                            | 4 |
| <b>Fig. S4.</b> The corresponding elemental mapping of HKUST-1. ....                                                  | 4 |
| <b>Fig. S5.</b> The corresponding elemental mapping of Au@HKUST-1. ....                                               | 4 |
| <b>Supplementary Table 1.</b> Analytical performance comparison of electrochemical sweat sensors.....                 | 5 |
| <b>Supplementary Table 2.</b> Determination of DA and UA in artificial saliva samples (n = 3)....                     | 6 |
| <b>Supplementary References</b> .....                                                                                 | 7 |

## Results and Discussion

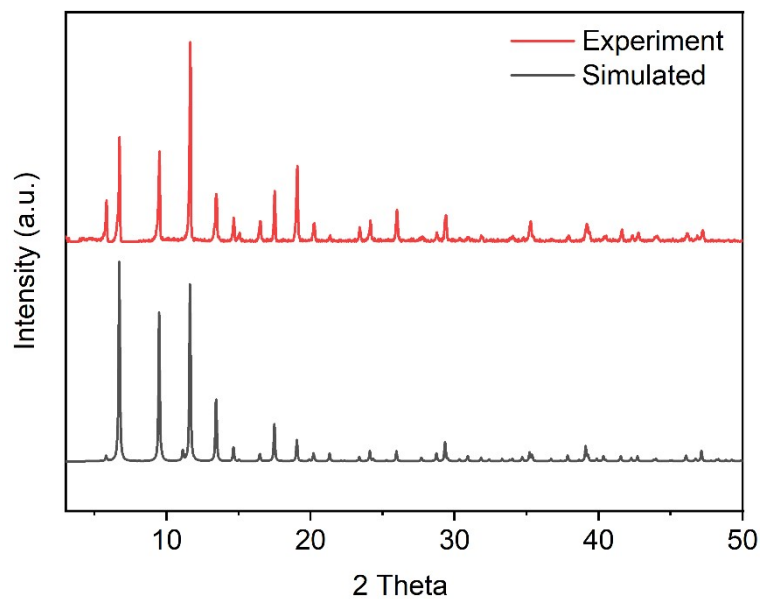

**Fig. S1.** PXRD patterns of HKUST-1. The synthesized (red line) and simulated one of HKUST-1 (black line).

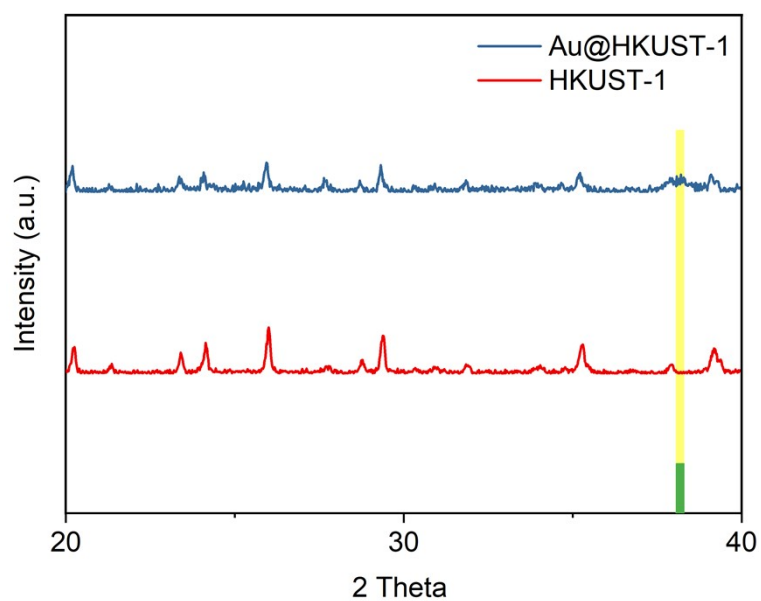

**Fig. S2.** Partial enlarged view of XRD patterns of HKUST-1, Au@HKUST-1 and Au.

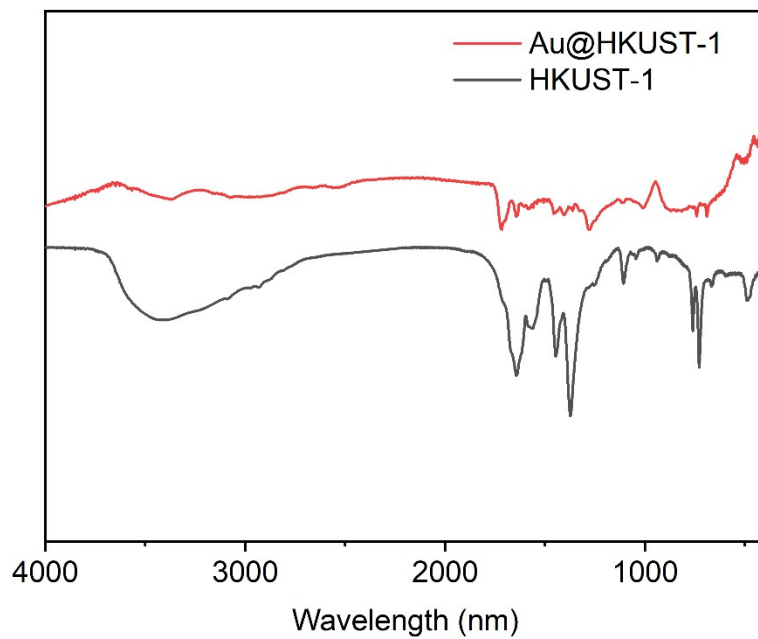

**Fig. S3.** FTIR spectrum of HKUST-1 and Au@HKUST-1.

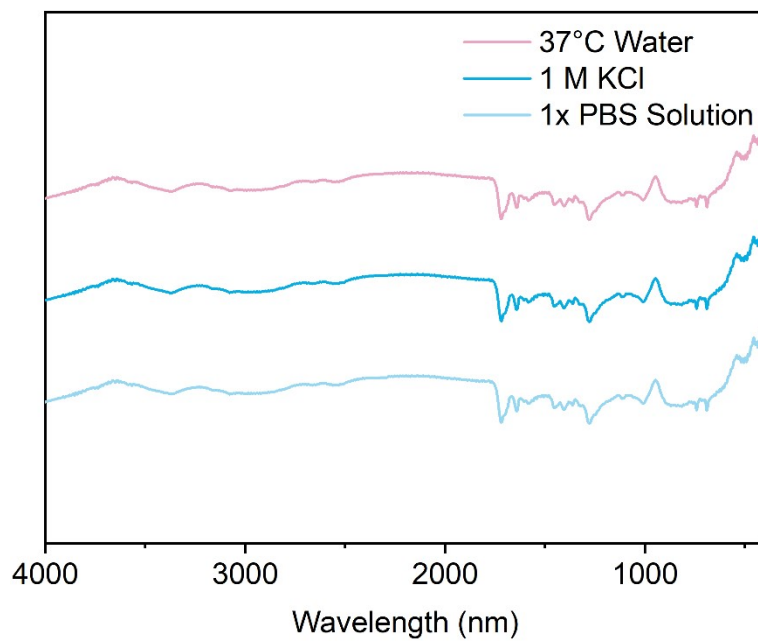

**Fig. S4.** FTIR spectrum of Au@HKUST-1 after soaking under different conditions.

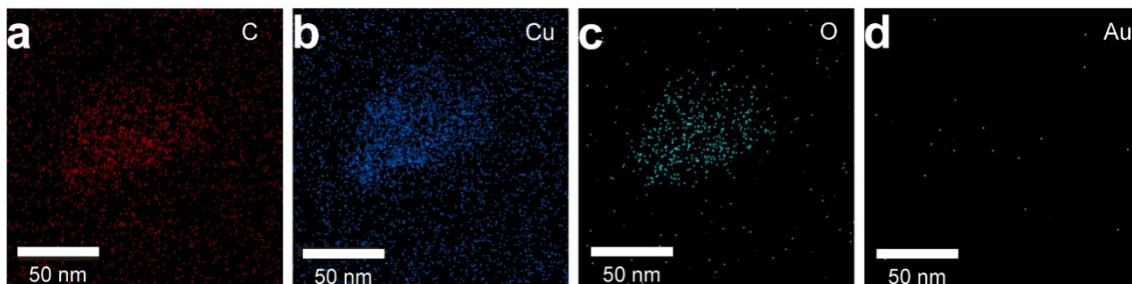

**Fig. S5.** The corresponding elemental mapping of HKUST-1.

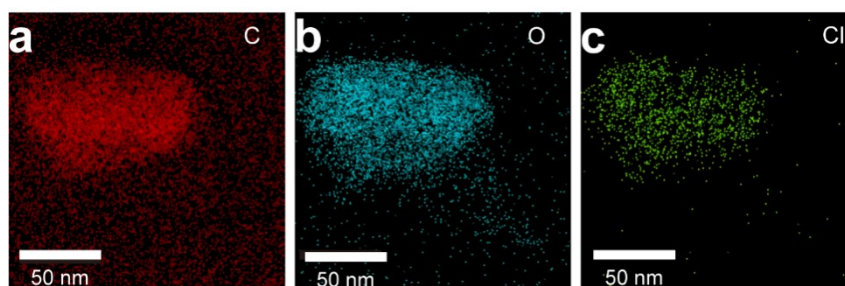

**Fig. S6.** The corresponding elemental mapping of Au@HKUST-1.

**Supplementary Table 1.** Analytical performance comparison of electrochemical sweat sensors.

| Modifier              | LOD( $\mu\text{M}$ ) | Ref.      |
|-----------------------|----------------------|-----------|
| PEDOT:PSShydrogel/CPE | 1.2                  | 1         |
| BGQDs/CNTs/SPCE       | 0.99                 | 2         |
| LEG-CS                | 0.74                 | 3         |
| uricase@MAF-7/SPE     | 0.34                 | 4         |
| 3DpCE                 | 0.03                 | 5         |
| ZIF-8/GO@enzyme/SPCE  | 0.28                 | 6         |
| Tyr@ZIF-8/GO/Au       | 0.45                 | 7         |
| AuNR/PEDOT:PSS/C/Pt   | 0.85                 | 8         |
| Au@HKUST-1/GCE        | DA/UA<br>0.10 0.15   | This work |

**Supplementary Table 2.** Determination of DA and UA in artificial saliva samples (n = 3).

| Analyte | Initial( $\mu\text{M}$ ) | Added ( $\mu\text{M}$ ) | Founded ( $\mu\text{M}$ ) | Recovery | RSD  |
|---------|--------------------------|-------------------------|---------------------------|----------|------|
| DA      | 10                       | 20                      | 29.09                     | 95.45%   | 1.71 |
|         |                          | 40                      | 51.32                     | 103.30%  | 2.43 |
|         |                          | 80                      | 88.17                     | 98.71%   | 3.54 |
| UA      | 10                       | 20                      | 32.37                     | 102.11%  | 2.64 |
|         |                          | 40                      | 49.99                     | 99.98%   | 1.20 |
|         |                          | 80                      | 88.82                     | 98.53%   | 2.51 |

## Supplementary References

1. Z. Xu, J. Song, B. Liu, S. Lv, F. Gao, X. Luo and P. Wang, *Sensors and Actuators B: Chemical*, 2021, **348**, 130674.
2. Y.-X. Wang, M. Rinawati, J.-D. Zhan, K.-Y. Lin, C.-J. Huang, K.-J. Chen, H. Mizuguchi, J.-C. Jiang, B.-J. Hwang and M.-H. Yeh, *ACS Applied Nano Materials*, 2022, **5**, 11100-11110.
3. Y. Yang, Y. Song, X. Bo, J. Min, O. S. Pak, L. Zhu, M. Wang, J. Tu, A. Kogan, H. Zhang, T. K. Hsiai, Z. Li and W. Gao, *Nature Biotechnology*, 2020, **38**, 217-224.
4. J. Xiao, Y. Luo, L. Su, J. Lu, W. Han, T. Xu and X. Zhang, *Analytica Chimica Acta*, 2022, **1208**, 339843.
5. D. L. Glasco, A. Sheelam, N. H. B. Ho and J. G. Bell, *Analytica Chimica Acta*, 2023, **1273**, 341546.
6. Q. Ning, S. Feng, Q. Sun, R. Yu, T. Li, H. Xu, D. Cui and K. Wang, *Nano Research*, 2024, **17**, 3096-3106.
7. J. Xiao, C. Fan, T. Xu, L. Su and X. Zhang, *Sensors and Actuators B: Chemical*, 2022, **359**, 131586.
8. H.-L. Peng, Y. Zhang, H. Liu and C. Gao, *ACS Sensors*, 2024, **9**, 3296-3306.
